# Supplementary material for: Genetic Risk Score, Combined Lifestyle Factors and Risk of Colorectal Cancer
Source: PubMed Central journal article supplement — Cancer Res Treat. 2018 Oct 18;51(3):1033–40. doi: 10.4143/crt.2018.447 (PMC6639208; doi:10.4143/crt.2018.447), 2018-10-18
Supplement: crt-2018-447-suppl4.pdf [file crt-2018-447-suppl4.pdf]

**S4 Table.** Association between genetic risk score and the risk of colorectal cancer, stratified by age<sup>a)</sup>

| Genetic risk score | < 50 Years            |                   |                                        | ≥ 50 Years         |                   |                                        |
|--------------------|-----------------------|-------------------|----------------------------------------|--------------------|-------------------|----------------------------------------|
|                    | No. of controls/cases | Crude OR (95% CI) | Multivariate OR (95% CI) <sup>b)</sup> | No. controls/cases | Crude OR (95% CI) | Multivariate OR (95% CI) <sup>b)</sup> |
| Unweighted         |                       |                   |                                        |                    |                   |                                        |
| ≤ 11               | 57/16                 | 1.0 (reference)   | 1.0 (reference)                        | 216/64             | 1.0 (reference)   | 1.0 (reference)                        |
| 12-16              | 164/70                | 1.52 (0.82-2.83)  | 1.60 (0.83-3.09)                       | 578/271            | 1.58 (1.16-2.17)  | 1.74 (1.23-2.46)                       |
| ≥ 17               | 70/55                 | 2.80 (1.45-5.40)  | 3.21 (1.59-6.47)                       | 210/156            | 2.51 (1.77-3.55)  | 2.82 (1.91-4.16)                       |
| Weighted           |                       |                   |                                        |                    |                   |                                        |
| T1                 | 70/18                 | 1.0 (reference)   | 1.0 (reference)                        | 253/80             | 1.0 (reference)   | 1.0 (reference)                        |
| T2                 | 133/61                | 1.78 (0.98-3.25)  | 1.94 (1.02-3.67)                       | 514/231            | 1.42 (1.06-1.91)  | 1.43 (1.03-1.98)                       |
| T3                 | 88/62                 | 2.74 (1.49-5.05)  | 3.04 (1.58-5.82)                       | 237/180            | 2.40 (1.75-3.30)  | 2.47 (1.73-1.98)                       |

OR, odds ratio; CI, confidence interval; T, tertile; SNP, single nucleotide polymorphism. <sup>a)</sup>Genetic risk score was calculated using 13 SNPs, <sup>b)</sup>Adjusted for sex, family history of colorectal cancer, education, obesity, physical activity, smoking, alcohol consumption, and dietary inflammatory index.
