# Supplementary figures and images for: Genetic Risk Score, Combined Lifestyle Factors and Risk of Colorectal Cancer
Source: PubMed Central journal article supplement — Cancer Res Treat. 2018 Oct 18;51(3):1033–40. doi: 10.4143/crt.2018.447 (PMC6639208; doi:10.4143/crt.2018.447), 2018-10-18

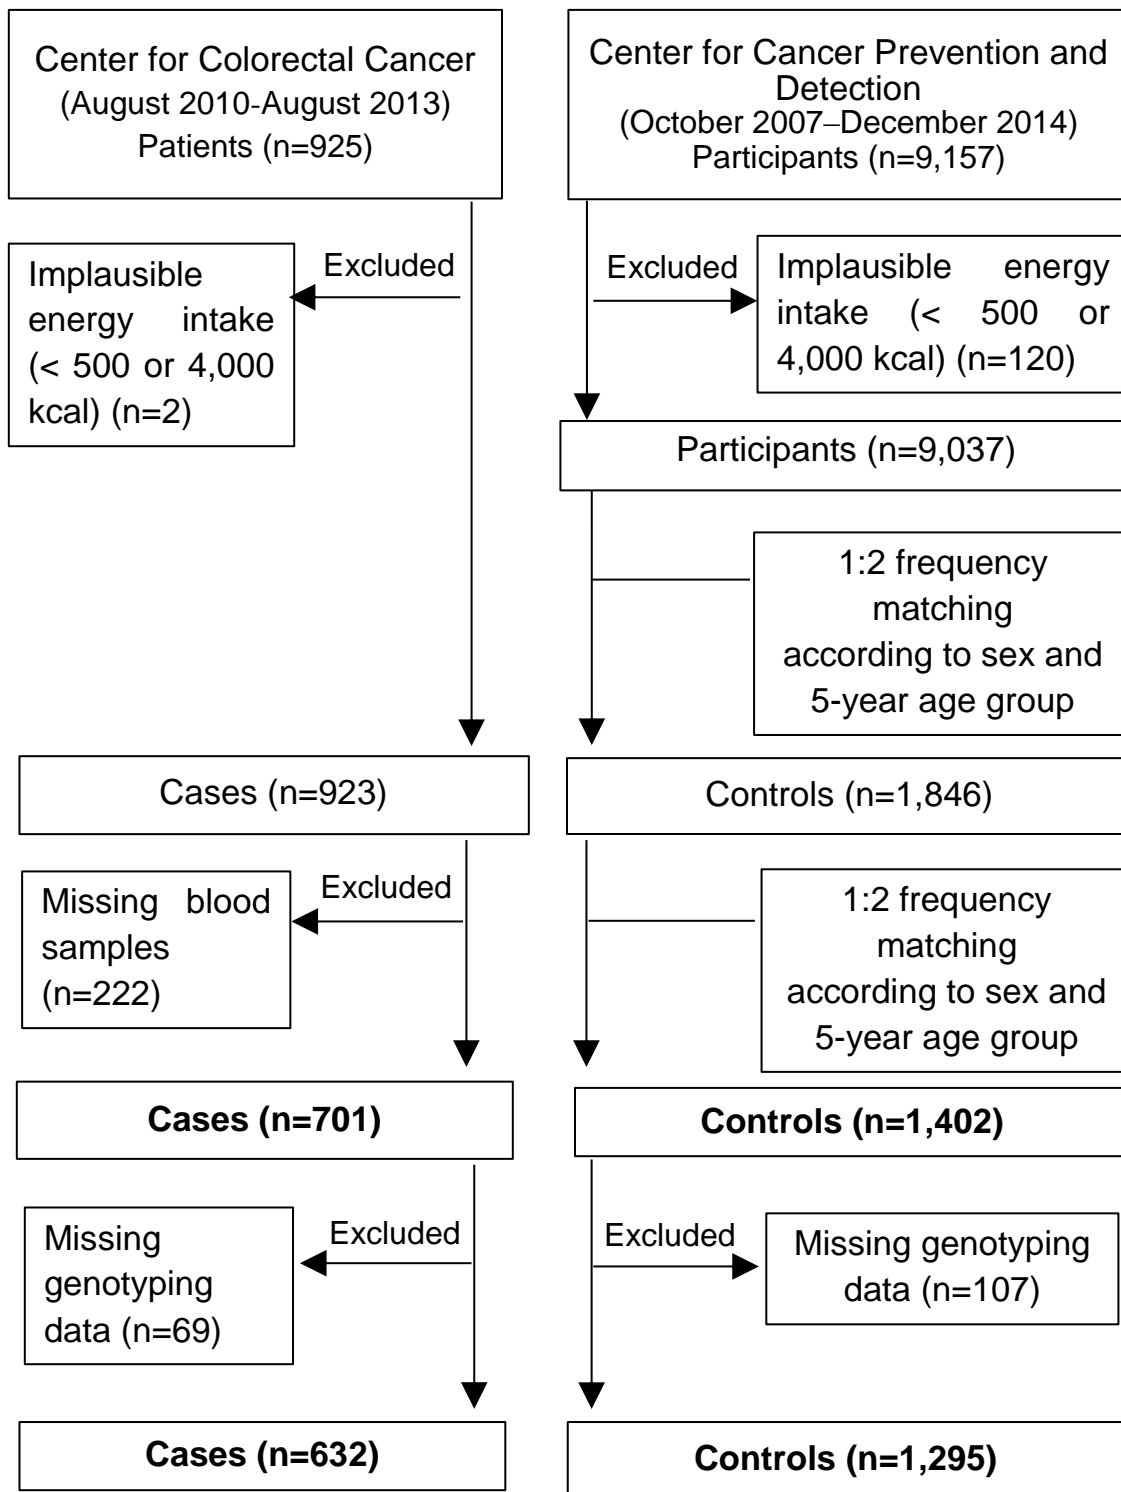

**S1 Fig.** Flow diagram showing the selection of cases and controls.

Supplement: crt-2018-447-suppl1.pdf [file crt-2018-447-suppl1.pdf]
